# Supplementary material for: Fungal F8-Culture Filtrate Induces Tomato Resistance against Tomato Yellow Leaf Curl Thailand Virus
Source: MDPI journal article supplement (doi:10.3390/v13081434), 2021-07-23
Supplement: s1 [file s1]

# Supplementary Materials

| Table S1. Primers sequence |                        |                          |                          |
|----------------------------|------------------------|--------------------------|--------------------------|
| Genes                      | Accession no.          | Forward                  | Reverse                  |
| <i>SIDCL2</i>              | <i>Solyc 06g048960</i> | GAGTGCCATAATGCACGAGG     | TTGCCAATAACTATCTGCTGTG   |
| <i>SIDCL4</i>              | <i>Solyc 07g005030</i> | CTTTGTTGAACTACCTCCTG     | ATTGCTAACTCCCTCCC        |
| <i>SIAGO1a</i>             | <i>Solyc 06g072300</i> | CTATCAGCCCCAGTTACGTTTG   | ATCACCCTTTTGACATTCTCCTTG |
| <i>SIPR1</i>               | NM_001247429           | AACGCTCACAATGCAGCTCGT    | AAGGTCCACCAGAGTGTTGC     |
| <i>SIPR5</i>               | NM_001247422           | GCAACAACGTGCCATACACC     | AGACTCCACCACAATCACC      |
| <i>SIPti4</i>              | NM_001347076           | TCGTCGGGAAACGGTTCCAT     | GACATCCAACCTGCATGACACTTG |
| <i>SIETR4</i>              | NM_001247276           | GGTAATCCCAAATCCAGAAGGTTT | CAATTGATGGCCGCAGTTG      |
| <i>SIOPR3</i>              | NM_001246944           | ATGTTGGTCGTGCATCTCAT     | GGTTCCAATTGCTCTTGTT      |
| <i>SISTH2</i>              | <i>Solyc05g054380</i>  | GAAGGGGATCCATTGGGACAA    | TTCCCATAGCACTATCTTTTCC   |
| <i>SIPMR4</i>              | <i>Solyc07g053980</i>  | GCCGGCGGCGAGACAAGTTT     | CAGCGCCAGCCAGTCAAGCA     |

|                                   |          |                              |                        |
|-----------------------------------|----------|------------------------------|------------------------|
| TYLCTHV DNA-A                     | GU723754 | TATTCGGTGTTGCACCTTGA         | AGGCGGAATTCCCACTATCT   |
| TYLCTHV DNA-B                     | GU723754 | GGGTCTTTGGGGGAGAAA           | TCGGATAGGACTGAATTCAG   |
| TYLCTHV DNA-A_Semi                | GU723754 | TTTCCGTACTTTGTGTTTGATTGCCAGT | CATACAACGGAAACCGTGGACG |
| <i>Sl<math>\beta</math>-Actin</i> | TC178617 | GGAAAAGCTTGCCTATGTGG         | CCTGCAGCTTCCATACCAAT   |

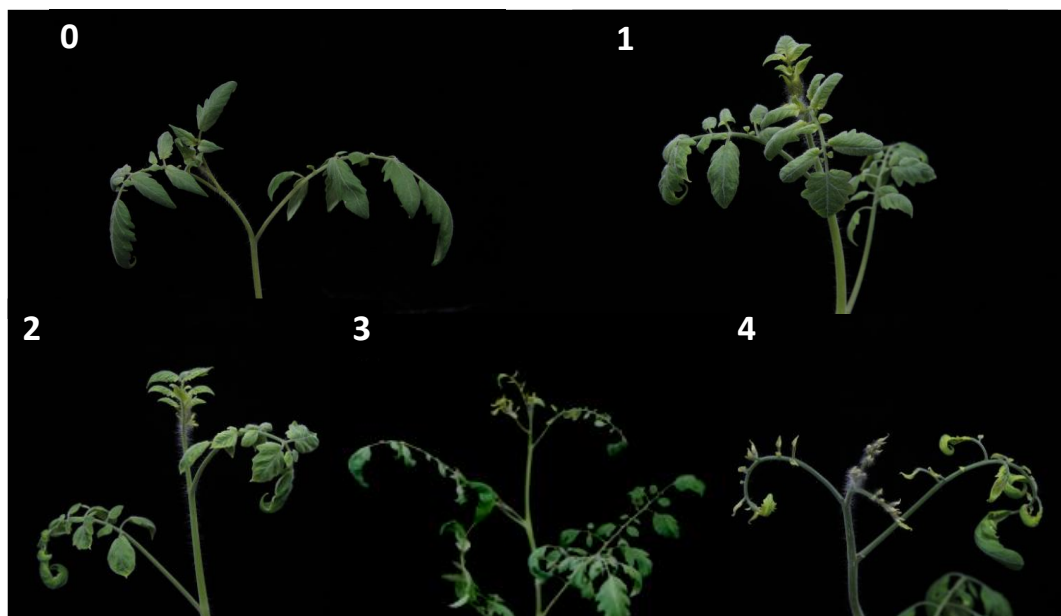

**Figure S1.** Disease index of Yu-Nu tomato inoculated with tomato yellow leaf curl Thailand virus (TYLCTHV). Yu-Nu were inoculated with TYLCTHV by white fly vector. The disease index was classified into 5 levels according to the degree of yellowing, stunting, and wilting at 28 dpi to 35 dpi. 0 = no visible symptoms, inoculated plants show the same growth and development as non-inoculated plants; 1 = slight yellowing and minor curling of leaflet ends; 2 = wide range of leaf yellowing, curling and cupping, with some reduction in size; 3 = wide range of leaf yellowing, pronounced leaf cupping and curling; 4 = very severe plant stunting and leaf yellowing, pronounced leaf cupping and curling, and plant ceased to grow.

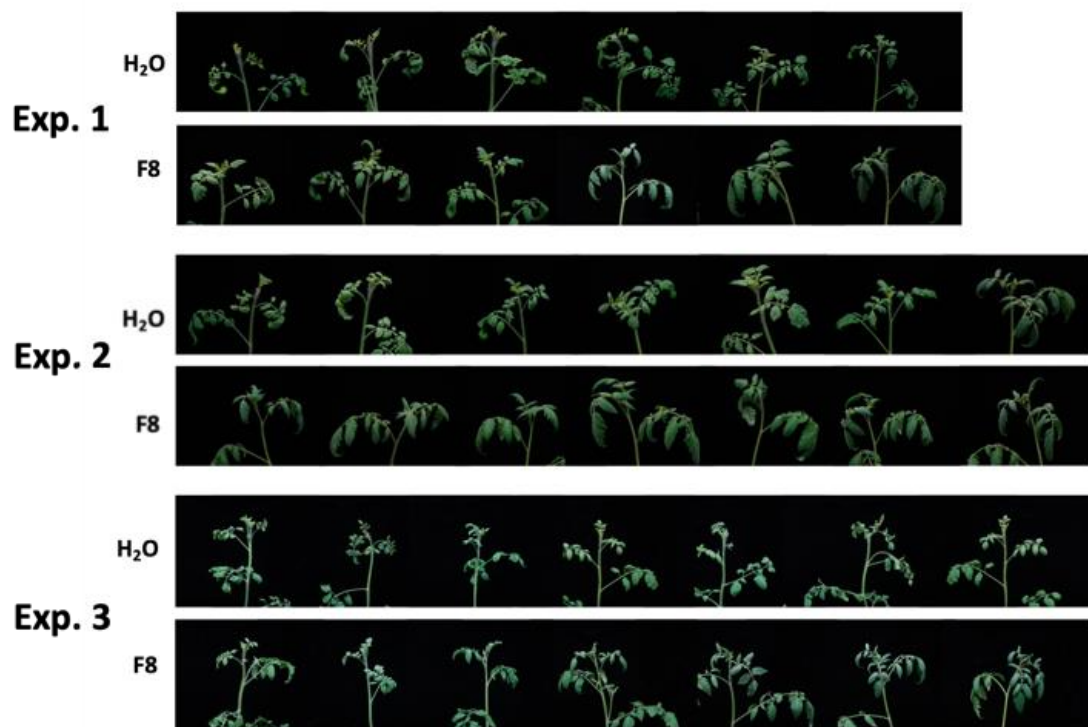

**Figure S2.** Symptom of Yu-Nu tomato inoculated with tomato yellow leaf curl Thailand virus (TYLCTHV). Disease symptoms of tomato plants pretreated with H<sub>2</sub>O or F8-culture filtrate inoculated with TYLCTHV in 3 independent replicates of experiments (Exp.1, Exp. 2, and Exp. 3). The photos were taken at 28 dpi.

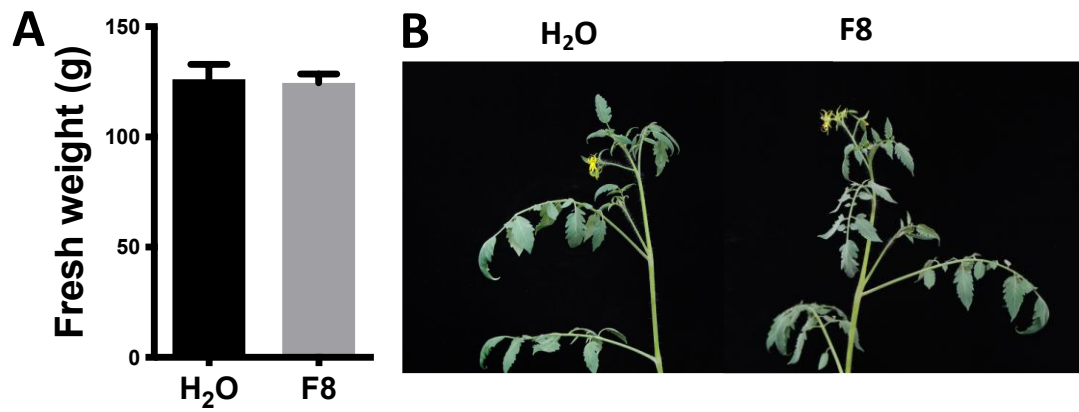

**Figure S3.** Fresh weight of Yu-Nu tomato with H<sub>2</sub>O or F8-culture filtrate pretreatment of repeated experiment set. **(A)** The average fresh weight was recorded for each treatment group ( $n = 8$ ). **(B)** The phenotype of H<sub>2</sub>O or F8-culture filtrate at 5 weeks post treatment.
